# Supplementary material for: Perceptions of readiness for independent practice among graduating orthopedic surgery residents in Ontario in the last 30 years
Source: PubMed Central journal article supplement — Can J Surg. 2024 Nov 6;67(6):E370–6. doi: 10.1503/cjs.005124 (PMC11573426; doi:10.1503/cjs.005124), 2024-11-06
Supplement: CJS-005124-at-1.pdf [file CJS-005124-at-1.pdf]

**Appendix 1** to Ndoja S, Howe HS, Papp SR, et al. Reasons for 90-day emergency department visits after primary knee arthroplasty. *Can J Surg* 2024. Copyright © 2024 The Author(s) or their employer(s).

To receive this resource in an accessible format, please contact us at [cmajgroup@cmaj.ca](mailto:cmajgroup@cmaj.ca).

DOI: 10.1503/cjs.005124

*Online appendices are unedited and posted as supplied by the authors.*

That specific fellowship(s) had

better remuneration than others

This was not an area I felt I

was fully comfortable in being

independent in

**What did you do your fellowship (s) in?**

- Pediatrics
- Sports
- Upper extremity
- Trauma
- Foot & Ankle
- Arthroplasty (lower extremity reconstruction)
- Spine
- Tumor
- Other: \_\_\_\_\_

**What city(s) did you do your fellowship(s) in:**

\_\_\_\_\_

**Did you locum during fellowship?**

- Yes
- No

**How long did it take to gain full-time permanent employment AFTER formal training?**

*(Fellowships are considered formal training)*

**Appendix 1** to Ndoja S, Howe HS, Papp SR, et al. Reasons for 90-day emergency department visits after primary knee arthroplasty. *Can J Surg* 2024. Copyright © 2024 The Author(s) or their employer(s).

To receive this resource in an accessible format, please contact us at [cmajgroup@cmaj.ca](mailto:cmajgroup@cmaj.ca).

DOI: 10.1503/cjs.005124

*Online appendices are unedited and posted as supplied by the authors.*

|                       |                       |                       |                       |                       |  |                       |
|-----------------------|-----------------------|-----------------------|-----------------------|-----------------------|--|-----------------------|
| Directly              |                       |                       |                       |                       |  | I still do not have   |
| out of                |                       | 6 months              |                       | More than 2           |  | permanent full-       |
| training              | 0-6 months            | – 1 year              | 1-2 years             | years                 |  | time employment       |
| <input type="radio"/> |  | <input type="radio"/> |

**Are you currently looking for full time employment?**

*Skip this question if you have a permanent employment*

- Yes
- No, I prefer flexible employment by choice
- No, I would prefer secure employment but I have given up looking for one

**How would you describe your practice?**

- Academic subspecialist
- Community subspecialist
- Academic generalist
- Community generalist

**How many OR days on average do you currently have allocated?**

|                       |                       |                       |                       |                       |
|-----------------------|-----------------------|-----------------------|-----------------------|-----------------------|
| <1                    | 1                     | 2                     | 3                     | 4 or more             |
| <input type="radio"/> |

**Appendix 1** to Ndoja S, Howe HS, Papp SR, et al. Reasons for 90-day emergency department visits after primary knee arthroplasty. *Can J Surg* 2024. Copyright © 2024 The Author(s) or their employer(s).

To receive this resource in an accessible format, please contact us at [cmaigroup@cmaaj.ca](mailto:cmaigroup@cmaaj.ca).

DOI: 10.1503/cjs.005124

*Online appendices are unedited and posted as supplied by the authors.*

**How many clinic days on average do you currently have allocated?**

- |                       |                       |                       |                       |                       |
|-----------------------|-----------------------|-----------------------|-----------------------|-----------------------|
| <1                    | 1                     | 2                     | 3                     | 4 or more             |
| <input type="radio"/> |

**Appendix 1** to Ndoja S, Howe HS, Papp SR, et al. Reasons for 90-day emergency department visits after primary knee arthroplasty. *Can J Surg* 2024. Copyright © 2024 The Author(s) or their employer(s).

To receive this resource in an accessible format, please contact us at [cmaigroup@cmaaj.ca](mailto:cmaigroup@cmaaj.ca).

DOI: 10.1503/cjs.005124

*Online appendices are unedited and posted as supplied by the authors.*

**Mark on this line what percentage (%) would you say that your current operative techniques are based on skills you learned in fellowship?**

*Skip this question if you did not complete a fellowship*

|                    |       |    |    |    |    |    |    |    |    |    |    |                   |
|--------------------|-------|----|----|----|----|----|----|----|----|----|----|-------------------|
| My current         | 0     | 10 | 20 | 30 | 40 | 50 | 60 | 70 | 80 | 90 | 10 | My current        |
| operative          |       |    |    |    |    |    |    |    |    |    | 0  | operative         |
| techniques are not | _____ |    |    |    |    |    |    |    |    |    |    | techniques are    |
| at all based on my | _____ |    |    |    |    |    |    |    |    |    |    | exclusively based |
| fellowship         |       |    |    |    |    |    |    |    |    |    |    | on my fellowship  |

**Mark on this line what percentage (%) would you say that your current operative techniques are based on skills you learned in residency?**

|                    |       |    |    |    |    |    |    |    |    |    |    |                   |
|--------------------|-------|----|----|----|----|----|----|----|----|----|----|-------------------|
| My current         | 0     | 10 | 20 | 30 | 40 | 50 | 60 | 70 | 80 | 90 | 10 | My current        |
| operative          |       |    |    |    |    |    |    |    |    |    | 0  | operative         |
| techniques are not | _____ |    |    |    |    |    |    |    |    |    |    | techniques are    |
| at all based on my | _____ |    |    |    |    |    |    |    |    |    |    | exclusively based |
| residency          |       |    |    |    |    |    |    |    |    |    |    | on my residency   |

**Appendix 1** to Ndoja S, Howe HS, Papp SR, et al. Reasons for 90-day emergency department visits after primary knee arthroplasty. *Can J Surg* 2024. Copyright © 2024 The Author(s) or their employer(s).

To receive this resource in an accessible format, please contact us at [cmaigroup@cmaaj.ca](mailto:cmaigroup@cmaaj.ca).

DOI: 10.1503/cjs.005124

*Online appendices are unedited and posted as supplied by the authors.*

**These questions ask how you feel about your work on an average day this month**

*Please check one circle per row.*



**Appendix 1** to Ndoja S, Howe HS, Papp SR, et al. Reasons for 90-day emergency department visits after primary knee arthroplasty. *Can J Surg* 2024. Copyright © 2024 The Author(s) or their employer(s).

To receive this resource in an accessible format, please contact us at [cmajgroup@cmaj.ca](mailto:cmajgroup@cmaj.ca).

DOI: 10.1503/cjs.005124

*Online appendices are unedited and posted as supplied by the authors.*

|                    |                       |                       |                       |                       |                       |                       |                       |
|--------------------|-----------------------|-----------------------|-----------------------|-----------------------|-----------------------|-----------------------|-----------------------|
| I get carried away | <input type="radio"/> |
| when I'm working   |                       |                       |                       |                       |                       |                       |                       |

**How long has it been since you finished formal training (residency and fellowship(s))?**

|                       |                       |                       |                       |                       |                       |                       |                       |
|-----------------------|-----------------------|-----------------------|-----------------------|-----------------------|-----------------------|-----------------------|-----------------------|
|                       |                       |                       |                       |                       |                       | 5-10                  | I have not            |
| <1 year               | 1-2 years             | 2-3 years             | 3-4 years             | 4-5 years             | years                 | 10+ years             | finished formal       |
| <input type="radio"/> | training yet          |
|                       |                       |                       |                       |                       |                       |                       | <input type="radio"/> |

**How long after finishing formal training (residency and fellowship) did you feel comfortable operating independently?**

|                       |                       |                       |                       |                       |                       |                       |                           |
|-----------------------|-----------------------|-----------------------|-----------------------|-----------------------|-----------------------|-----------------------|---------------------------|
|                       | 6                     |                       |                       |                       |                       |                       | I do not feel comfortable |
| 0-6                   | months                | 1-2                   | 2-3                   | 3-4                   | 4-5                   |                       | operating independently   |
| months                | – 1 year              | years                 | years                 | years                 | years                 | 6+ years              | yet                       |
| <input type="radio"/>     |

**What year did you graduate residency?** \_\_\_\_\_

**Did you feel like your residency prepared you for independent practice?**

- Yes I could have entered practice directly out of residency
- Yes, but I feel like doing a fellowship helped make things easier
- No, but with trial and error in practice I could have figured things out



**Appendix 1** to Ndoja S, Howe HS, Papp SR, et al. Reasons for 90-day emergency department visits after primary knee arthroplasty. *Can J Surg* 2024. Copyright © 2024 The Author(s) or their employer(s).

To receive this resource in an accessible format, please contact us at [cmaigroup@cmaaj.ca](mailto:cmaigroup@cmaaj.ca).

DOI: 10.1503/cjs.005124

*Online appendices are unedited and posted as supplied by the authors.*

- No, I would have needed help from colleagues early on
- No, I definitely needed to do a fellowship and extra training.

**What gender do you identify with?**

- Male
- Female
- Non-binary
- Prefer not to say
- Other: \_\_\_\_\_

**Where are you currently located**

- Canada
- United states
- Other: \_\_\_\_\_

**What state/ province do you currently practice in?** \_\_\_\_\_

**What prompted you to emigrate?**

*Skip this question if you are practicing in Canada*



**Appendix 1** to Ndoja S, Howe HS, Papp SR, et al. Reasons for 90-day emergency department visits after primary knee arthroplasty. *Can J Surg* 2024. Copyright © 2024 The Author(s) or their employer(s).

To receive this resource in an accessible format, please contact us at [cmaigroup@cmaj.ca](mailto:cmaigroup@cmaj.ca).

DOI: 10.1503/cjs.005124

*Online appendices are unedited and posted as supplied by the authors.*

Thank you for completing the survey. By sending the data back to us in the pre-paid envelope you are agreeing to partake in this study. The data will be recorded and de-anonymized immediately and will not be able to be removed on request as we will be unable to identify it.
